# Supplementary material for: Comparing the effect of isotopically labeled or structural analog internal standards on the performance of a LC-MS/MS method to determine ciclosporin A, everolimus, sirolimus and tacrolimus in whole blood
Source: publisher site journal article supplement (doi:10.1515/cclm-2015-0519), 2015-08-19
Supplement: Supplementary file 1 [file cclm-2015-0519_Suppl.docx]

**Supplemental Table 1. Imprecision and inaccuracy of the accredited method (using analogue internal standards) during the time of the study.**

| **Analyte** | **Target Value µg/L** | **Measured Value, Mean ±SD µg/L (CV%)** | **Bias, Median (range) %** |
| --- | --- | --- | --- |
| Ciclosporin | 51 | 50 ±2 (4.8) | -1.5 (-9.8; 9.9) |
|  | 258 | 246 ±11 (4.3) | -4.6 (-9.3, 8.9) |
|  | 1123 | 1113±249 (4.4) | -1 (-10.2; 9.7) |
| Everolimus | 2.7 | 2.75 ±0.2 (6.1) | 2.6 (-9.3; 11.1) |
|  | 5.1 | 5.1 ±0.3 (6.0) | 3 (-9.8; 10.4) |
|  | 34.6 | 35.3±1.8 (4.9) | 2.9 (-8.4; 9.8) |
| Sirolimus | 2.9 | 2.9 ±0.2 (5.6) | -1 (-10.0; 9.7) |
|  | 10 | 10.4 ±0.4 (4.2) | 6.2 (-5.1; 12.0) |
|  | 38.9 | 40.9 ±1.4 (3.4) | 4.9 (-2.6; 10.8) |
| Tacrolimus | 2.6 | 2.7 ±0.1 (5.0) | 1.9 (-9.2; 9.2) |
|  | 7.1 | 7.4 ±0.3 (3.5) | 4.2 (-4.2; 11.3) |
|  | 32.2 | 34.3 ±0.7 (2.1) | 6.8 (0.6; 9.6) |
